# Supplementary material for: Hg2Ru2O7, a new pyrochlore showing a metal–insulator transition
Source: Royal Society of Chemistry journal article supplement (doi:10.1039/b615653c), 2007-01-01
Supplement: b615653c.pdf [file b615653c.pdf]

## Supplementary data

### Hg<sub>2</sub>Ru<sub>2</sub>O<sub>7</sub>, a new pyrochlore showing a metal/insulator transition

Wilhelm Klein,<sup>\*a,b</sup> Reinhard K. Kremer<sup>a</sup> and Martin Jansen<sup>a</sup>

<sup>a</sup> Max-Planck-Institute for Solid State Research, Heisenbergstraße 1, D-70569 Stuttgart, Germany. <sup>b</sup> Current address: Institute for Inorganic and Applied Chemistry, University of Hamburg, Martin-Luther-King-Platz 6, D-20146 Hamburg, Germany. Fax: +49 40 42838 6348; Tel: +49 40 42838 4308; E-mail: wilhelm.klein@chemie.uni-hamburg.de

Observed and calculated X-ray powder diffraction data for Hg<sub>2</sub>Ru<sub>2</sub>O<sub>7</sub> at 293 K with  $d > 0.89$  Å (Cu K $\alpha_1$  radiation)

| No. | d      | observed<br>2 $\theta$ | I <sub>rel</sub> | h | k | l | d      | calculated<br>2 $\theta$ | I <sub>rel</sub> |
|-----|--------|------------------------|------------------|---|---|---|--------|--------------------------|------------------|
| 1   | 5.8946 | 15.018                 | 8.0              | 1 | 1 | 1 | 5.8896 | 15.030                   | 6.48             |
| 2   | 3.0762 | 29.003                 | 5.5              | 3 | 1 | 1 | 3.0758 | 29.007                   | 4.17             |
| 3   | 2.9452 | 30.323                 | 100.0            | 2 | 2 | 2 | 2.9448 | 30.327                   | 100.0            |
| 4   | 2.5505 | 35.159                 | 37.3             | 4 | 0 | 0 | 2.5503 | 35.161                   | 36.16            |
| 5   | 2.3404 | 38.433                 | 9.2              | 3 | 3 | 1 | 2.3403 | 38.434                   | 7.24             |
| 6   | 2.0824 | 43.421                 | 0.3              | 4 | 2 | 2 | 2.0823 | 43.422                   | 0.24             |
| 7   | 1.9631 | 46.205                 | 3.6              | 5 | 1 | 1 | 1.9632 | 46.204                   | 3.06             |
| 8   | 1.8033 | 50.576                 | 40.6             | 4 | 4 | 0 | 1.8033 | 50.574                   | 39.54            |
| 9   | 1.7243 | 53.070                 | 2.8              | 5 | 3 | 1 | 1.7243 | 53.068                   | 2.41             |
| 10  | 1.6121 | 57.087                 | 0.2              | 6 | 2 | 0 | 1.6129 | 57.054                   | 0.19             |
| 11  | 1.5556 | 59.362                 | 0.5              | 5 | 3 | 3 | 1.5557 | 59.360                   | 0.41             |
| 12  | 1.5378 | 60.120                 | 34.7             | 6 | 2 | 2 | 1.5379 | 60.117                   | 38.27            |
| 13  | 1.4724 | 63.090                 | 9.0              | 4 | 4 | 4 | 1.4724 | 63.088                   | 10.08            |
| 14  | 1.4284 | 65.267                 | 0.9              | 7 | 1 | 1 | 1.4284 | 65.266                   | 0.89             |
| 15  | 1.3280 | 70.904                 | 0.9              | 7 | 3 | 1 | 1.3281 | 70.902                   | 0.95             |
| 16  | 1.2751 | 74.328                 | 4.1              | 8 | 0 | 0 | 1.2751 | 74.326                   | 5.42             |
| 17  | 1.2462 | 76.357                 | 0.7              | 7 | 3 | 3 | 1.2463 | 76.353                   | 0.84             |

Supplementary Material (ESI) for *Journal of Materials Chemistry*  
This journal is © The Royal Society of Chemistry 2006

|    |        |         |      |    |   |   |        |         |       |
|----|--------|---------|------|----|---|---|--------|---------|-------|
| 18 | 1.1779 | 81.684  | 0.7  | 7  | 5 | 1 | 1.1779 | 81.679  | 0.83  |
| 19 | 1.1701 | 82.342  | 10.1 | 6  | 6 | 2 | 1.1702 | 82.339  | 14.08 |
| 20 | 1.1405 | 84.972  | 8.1  | 8  | 4 | 0 | 1.1405 | 84.969  | 12.32 |
| 21 | 1.1197 | 86.935  | 0.6  | 9  | 1 | 1 | 1.1197 | 86.934  | 0.87  |
| 22 | 1.0694 | 92.158  | 0.2  | 9  | 3 | 1 | 1.0694 | 92.163  | 0.24  |
| 23 | 1.0411 | 95.438  | 5.5  | 8  | 4 | 4 | 1.0412 | 95.438  | 9.76  |
| 24 | 1.0252 | 97.411  | 0.4  | 7  | 7 | 1 | 1.0253 | 97.410  | 0.74  |
| 25 | 0.9862 | 102.721 | 0.2  | 9  | 5 | 1 | 0.9862 | 102.721 | 0.42  |
| 26 | 0.9816 | 103.390 | 5.3  | 10 | 2 | 2 | 0.9816 | 103.392 | 11.67 |
| 27 | 0.9513 | 108.145 | 0.2  | 9  | 5 | 3 | 0.9513 | 108.146 | 0.34  |
| 28 | 0.9199 | 113.729 | 0.2  | 11 | 1 | 1 | 0.9198 | 113.745 | 0.29  |
| 29 | 0.9017 | 117.364 | 1.4  | 8  | 8 | 0 | 0.9017 | 117.367 | 3.94  |
| 30 | 0.8913 | 119.597 | 0.2  | 11 | 3 | 1 | 0.8913 | 119.597 | 0.69  |

---
